# Supplementary material
Source: HighWire-hosted journal article supplement (https://heart.bmj.com/content/heartjnl-2017-312255)
Supplement: inline-supplementary-material-2 [file inline-supplementary-material-2.pdf]

## Online Supplemental Material

**Online Supplemental table 1. Medication use and control of blood pressure, fasting plasma glucose and total cholesterol as defined by the American Heart Association Ideal Cardiovascular Health metrics.**

| Variable                               | N   | Poor           | Intermediate,<br>not-<br>controlled | Intermediate,<br>controlled* | p-value |
|----------------------------------------|-----|----------------|-------------------------------------|------------------------------|---------|
| <b>Overall</b>                         |     |                |                                     |                              |         |
| Blood Pressure medication, N (%)       | 321 | 128<br>(39.9%) | 116 (36.1%)                         | 77 (24.0%)                   | <0.001  |
| Glucose-lowering medication, N (%)     | 94  | 60<br>(63.8%)  | 17 (18.1%)                          | 17 (18.1%)                   | <0.001  |
| Cholesterol-lowering medication, N (%) | 58  | 12<br>(20.7%)  | 20 (34.5%)                          | 26 (44.8%)                   | 0.418   |
| <b>Female</b>                          |     |                |                                     |                              |         |
| Blood Pressure medication, N (%)       | 214 | 84<br>(39.3%)  | 76 (35.5%)                          | 54 (25.2%)                   | <0.001  |
| Glucose-lowering medication, N (%)     | 54  | 39<br>(72.2%)  | 8 (14.8%)                           | 7 (13.0%)                    | <0.001  |
| Cholesterol-lowering medication, N (%) | 41  | 10<br>(24.4%)  | 14 (34.2%)                          | 17 (41.5%)                   | 0.481   |
| <b>Male</b>                            |     |                |                                     |                              |         |
| Blood Pressure medication, N (%)       | 107 | 44<br>(41.1%)  | 40 (37.4%)                          | 23 (21.5%)                   | <0.001  |
| Glucose-lowering medication, N (%)     | 40  | 21<br>(52.5%)  | 9 (22.5%)                           | 10 (25.0%)                   | <0.001  |
| Cholesterol-lowering medication, N (%) | 17  | 2 (11.8%)      | 6 (35.3%)                           | 9 (52.9%)                    | 0.932   |

\*Intermediate, controlled = measurement for metric falls in the ideal cut-off range but participant was classified as intermediate due to medication use.

**Online supplemental table 2. Prevalence estimates for poor, intermediate and ideal cardiovascular health for each of the 7**

**American Heart Association Ideal Cardiovascular Health metrics in adults aged ≥35 years old by sex (N=3058)\*.**

| Variable               | Poor          |         | Male          |         | Intermediate |         | Male        |         | Ideal       |         | Male        |         |
|------------------------|---------------|---------|---------------|---------|--------------|---------|-------------|---------|-------------|---------|-------------|---------|
|                        | N             | (%)     | N             | (%)     | N            | (%)     | N           | (%)     | N           | (%)     | N           | (%)     |
| Blood Pressure         | 172           | -11.00% | 239           | -16.10% | 402          | -25.60% | 557         | -37.40% | 995         | -63.40% | 693         | -46.50% |
| 95% CI                 | 9.4%-12.5%    |         | 14.2%-17.9%   |         | 23.5%-27.8%  |         | 35.0%-39.9% |         | 61.0%-65.8% |         | 44.0%-49.1% |         |
| Fasting Plasma Glucose | 103           | -6.60%  | 76            | -5.10%  | 314          | -20%    | 298         | -20%    | 1152        | -73.40% | 1115        | -74.90% |
| 95% CI                 | 5.3%-7.8%     |         | 4.0%-6.2%     |         | 18.0%-22.0%  |         | 18.0%-22.1% |         | 71.2-75.6%  |         | 72.7-77.1%  |         |
| Total Cholesterol      | 292           | -18.60% | 195           | -13.10% | 510          | -32.50% | 473         | -31.80% | 767         | -48.90% | 821         | -55.10% |
| 95% CI                 | 16.7%-20.5%   |         | 11.4%-14.8%   |         | 30.2%-34.8%  |         | 29.4%-34.1% |         | 46.4%-51.4% |         | 52.6%-57.7% |         |
| Healthy Diet Score     | 598           | 38.11%  | 698           | 46.88%  | 958          | 61.06%  | 776         | 52.12%  | 13          | 0.83%   | 15          | 1.01%   |
| 95% CI                 | 35.7%-40.5%   |         | 44.3%-49.4%   |         | 58.6%-63.5%  |         | 49.6%-54.7% |         | 0.4% - 1.3% |         | 0.5% - 1.5% |         |
| Fruit and vegetables   | 1458          | 92.93%  | 1416          | 95.10%  | n/a          |         |             |         | 111         | 7.07%   | 73          | 4.90%   |
| 95% CI                 | 91.7% - 94.2% |         | 94.0% - 96.2% |         |              |         |             |         | 5.8% - 8.3% |         | 3.8% - 6.0% |         |
| Physical Activity      | 1458          | -92.90% | 1219          | -81.90% | 49           | -3.10%  | 132         | -8.90%  | 62          | -4.00%  | 138         | -9.30%  |
| 95% CI                 | 91.7%-94.2%   |         | 79.9%-83.8%   |         | 2.3%-4.0%    |         | 7.4%-10.3%  |         | 3.0%-4.9%   |         | 7.8%-10.7%  |         |
| Body Mass Index        | 545           | -34.70% | 284           | -19.10% | 632          | -40.30% | 715         | -48.00% | 392         | -25.00% | 490         | -32.90% |
| 95% CI                 | 32.4%-37.1%   |         | 17.1%-21.1%   |         | 37.9%-42.7%  |         | 45.5%-50.6% |         | 22.8%-27.1% |         | 30.5%-35.3% |         |
| Current Smoking        | 64            | -4.10%  | 296           | -19.90% | 10           | -0.60%  | 45          | -3.00%  | 1495        | -95.30% | 1148        | -77.10% |
| 95% CI                 | 3.1%-5.1%     |         | 17.9%-21.9%   |         | 0.2%-1.0%    |         | 2.2%-3.9%   |         | 94.2%-96.3% |         | 75.0%-79.2% |         |

\*Reference: (22) | Abbreviations: CI, confidence interval.
